1 **Category: Brief Research Report**

2

3 **Genomic and epidemiological evidence of a dominant Panton-Valentine leucocidin-positive**  
4 **Methicillin Resistant *Staphylococcus aureus* lineage in Sri Lanka with spread to the United**  
5 **Kingdom and Australia**

6 S.M. McTavish<sup>1\*</sup>, S.J. Snow<sup>2\*</sup>, E.C. Cook<sup>2\*</sup>, B. Pichon<sup>1</sup>, S. Coleman<sup>3</sup>, G.W. Coombs<sup>4</sup>, S. Pang<sup>4</sup>,  
7 C.A. Arias<sup>5,6,7</sup>, L. Díaz<sup>5,7</sup>, E. Boldock<sup>2,3</sup>, S. Davies<sup>3</sup>, M. Udukala<sup>8</sup>, A. Kearns<sup>1</sup>, S. Siribaddana<sup>8,9</sup> and  
8 T.I. de Silva<sup>2,10</sup>

9

10 1. Healthcare Associated Infections and Antimicrobial Resistance AMR Division, National Infection  
11 Service, Public Health England, 61 Colindale Avenue, London NW9 5EQ, UK.

12 2. The Florey Institute for Host-Pathogen Interactions and Department of Infection, Immunity and  
13 Cardiovascular Disease, University of Sheffield, Sheffield, UK.

14 3. Dept of Microbiology, Sheffield Teaching Hospitals NHS Foundation Trust, Sheffield, UK.

15 4. Antimicrobial Resistance and Infectious Diseases Research Laboratory, School of Veterinary Life  
16 Sciences, Murdoch University, Murdoch, Western Australia, Australia.

17 5. Center for Antimicrobial Resistance and Microbial Genomics and Division of Infectious Diseases,  
18 UTHealth, McGovern Medical School, Houston, TX, USA.

19 6. Center for Infectious Diseases, UTHealth School of Public Health

20 7. Molecular Genetics and Antimicrobial Resistance Unit, International Center for Microbial  
21 Genomics, Universidad El Bosque, Bogota, Colombia.

22 8. Anuradhapura Teaching Hospital, Anuradhapura, Sri Lanka.

23 9. Faculty of Medicine and Allied Sciences, Rajarata University of Sri Lanka, Sri Lanka.

24 10. Department of Medicine, Wright Fleming Institute, Imperial College London, Norfolk Place,  
25 London W2 1PG, UK.

26 \* These authors contributed equally to this work.

27 Corresponding author:

28 Thushan I. de Silva

29 The Florey Institute for Host-Pathogen Interactions, Department of Infection, Immunity and  
30 Cardiovascular Disease, University of Sheffield, Beech Hill Road, Sheffield S10 2RX, UK.

31 Tel: +44 114 2159522, Fax: +44 114 2159508, Email: [t.desilva@sheffield.ac.uk](mailto:t.desilva@sheffield.ac.uk)

32

33 Keywords: Methicillin Resistant *Staphylococcus aureus*, Panton-Valentine leucocidin, Sri Lanka,

34 CC5

35

36

37

38

39

40

41

42

43

44

45

46

47 **Abstract**

48 Objective: To undertake the first detailed genomic analysis of methicillin-resistant *Staphylococcus*  
49 *aureus* (MRSA) isolated in Sri Lanka.

50 Methods: A prospective observational study was performed on 94 MRSA isolates collected over a  
51 four month period from the Anuradhapura Teaching Hospital, Sri Lanka. Screening for *mecA*, *mecC*  
52 and the Panton-Valentine leucocidin (PVL) -associated *lukS-PV/lukF-PV* genes and molecular  
53 characterisation by *spa* typing was undertaken. Whole genome sequencing (WGS) and phylogenetic  
54 analysis was performed on selected multilocus sequence type (MLST) clonal complex 5 (CC5)  
55 isolates from Sri Lanka, England, Australia and Argentina.

56 Results: All 94 MRSA harboured the *mecA* gene. Nineteen *spa* types associated with nine MLST  
57 clonal complexes were identified. Most isolates were from skin and soft tissue infections (76.9%),  
58 with the remainder causing more invasive disease. Sixty two (65.9%) of isolates were PVL positive  
59 with the majority (56 isolates; 90.3%) belonging to a dominant CC5 lineage. This lineage, PVL-  
60 positive ST5-MRSA-IVc, was associated with community and hospital-onset infections. Based on  
61 WGS, representative PVL-positive ST5-MRSA-IVc isolates from Sri Lanka, England and Australia  
62 formed a single phylogenetic clade, suggesting wide geographical circulation.

63 Conclusions: We present the most detailed genomic analysis of MRSA isolated in Sri Lanka to date.  
64 The analysis identified a PVL-positive ST5-MRSA-IVc that dominates MRSA clinical infections in  
65 Sri Lanka. Furthermore, transmission of the strain has occurred in the United Kingdom and Australia.

66

67

68

69

70

## 71 **Introduction**

72 Worldwide, *Staphylococcus aureus* is the primary causative agent of community-acquired skin and  
73 soft tissue infections (SSTI). The emergence of methicillin-resistant *S. aureus* (MRSA) has led to *S.*  
74 *aureus* becoming an important cause of hospital-associated invasive infections including bacteraemia,  
75 pneumonia and endocarditis (Bell et al., 2002;David and Daum, 2010). Panton-Valentine leucocidin  
76 (PVL)-positive MRSA is a well-documented cause of community-associated SSTI and less  
77 commonly, life-threatening infections in immunocompetent populations. Its prevalence is thought to  
78 be increasing worldwide and multi drug resistant PVL-MRSA is emerging as a threat, particularly in  
79 the Indian subcontinent (Song et al., 2011;Shallcross et al., 2013). In many developed countries,  
80 surveillance of MRSA invasive disease, characterisation of high risk MRSA clones and the  
81 investigation of suspected MRSA outbreaks are achieved through public health tracking and  
82 molecular analysis. By comparison, limited data exist on MRSA infections in low and middle-income  
83 countries. A recent report has suggested Sri Lankan hospitals have the highest prevalence of MRSA  
84 for all Asian hospitals that were included in the study (Song et al., 2011). However, information on  
85 the molecular epidemiology and spectrum of clinical disease is lacking (Corea et al.,  
86 2003;Mahalingam et al., 2014;Jayaweera et al., 2017;Jayaweera and Kumbukgolla, 2017).  
87 Consequently in our study, we report on the genomic analysis of MRSA isolated from patients  
88 admitted to a major teaching hospital in Sri Lanka.

89

## 90 **Methods**

91 A prospective, observational study of sequential MRSA infections in hospitalised patients was  
92 conducted at the Anuradhapura Teaching Hospital from 30<sup>th</sup> June to 31<sup>st</sup> October 2014. This hospital  
93 serves approximately 1.6 million people living in the rural North Central province of Sri Lanka.  
94 MRSA was identified from clinical specimens via disc diffusion using oxacillin and CLSI criteria. All  
95 MRSA isolated from any site with a clinical infection during the 4-month period were included in the

96 study. Ethical approval was obtained from the Ethics Review Committee, Rajarata University of Sri  
97 Lanka. Infections were defined as community-onset (CO) if the sample was collected <72 hours from  
98 admission and hospital-onset (HO) if collected later, based on previous studies distinguishing whether  
99 MRSA infection were associated with community or hospital settings (Maree et al., 2007).

100

101 Isolates were referred to the Staphylococcal Reference Service, National Infection Service, Public  
102 Health England (PHE), Colindale, London for further analysis. Initial testing was performed using the  
103 MALDI-TOF (MALDI Biotyper®, Bruker Daltonik GmbH, Germany), followed by reverse-  
104 transcriptase polymerase chain reaction (RT-PCR) for *mecA*, *mecC* and *lukS-PV/lukF-PV* genes, to  
105 determine the isolate's methicillin resistance, Panton-Valentine leucocidin (PVL) status, and *spa*  
106 typing (Frenay et al., 1996;Pichon et al., 2012). Whole genome sequencing (WGS) on selected  
107 isolates was undertaken as previously described (Garvey et al., 2016;Lahuerta-Marin et al., 2016).  
108 Phylogeny was inferred by maximum likelihood analysis using RAxML and the GTRCAT model.

109

## 110 **Results**

111 The 94 isolates submitted for further testing were confirmed as *S. aureus* by MALDI-TOF and were  
112 *mecA* positive (Table 1). No samples were *mecC* positive. Where clinical data were available (n=91),  
113 the majority of MRSA isolates (n=70, 76.9%) were from skin and soft tissue infections (SSTIs), with  
114 the remainder from invasive infections, including 16 (17.6%) MRSA bacteraemias (Table 1). Based  
115 on the 19 *spa* types identified, the isolates could be grouped into nine MLST clonal complexes (CC)  
116 including: CC5 (n=59 isolates), CC30 (n=18), CC1 (n=8), CC59 (n=4), and single isolates belonging  
117 to CC6, CC8, CC45, CC97 and CC101. The dominant CC5 MRSA lineage (62.7% of isolates) was  
118 comprised of six related *spa* types: t002 (n=51), t010 (n=4) and single isolates of t045, t1062, t5490  
119 and t7342. Sixty two (65.9%) isolates were PVL positive, the majority (56 isolates; 90.3%) belonging  
120 to the CC5 lineage. The CC5 PVL-positive lineage was associated mainly with HO- and CO-SSTIs

121 (42; 84.0%), but was also responsible for more invasive infections (Table 1). All HO-SSTIs were  
122 surgical wound infections.

123

124 To investigate whether the CC5 PVL-positive lineage was genotypically diverse, or a single  
125 circulating clone, WGS was performed on 41 isolates selected on the basis of diverse clinical  
126 symptoms and *spa* type (34 t002 and 7 samples from other *spa* types). As CC5 PVL-positive MRSA  
127 have been identified sporadically in England, we sought to assess the relatedness of the Sri Lankan  
128 isolates to lineage-matched isolates from held in the PHE archives. These included isolates from  
129 patients with known links to Sri Lanka (10 CC5 PVL-positive MRSA isolates (dates of collection  
130 between 2005 and 2014)) and patients with no known links to Sri Lanka (79 isolates: 12 CC5 PVL-  
131 positive MRSA (2005-2015), 33 CC5 PVL-negative MRSA (2009-2016), 4 CC5 PVL-positive  
132 methicillin-sensitive *S. aureus* (MSSA) (2011-2016) and 30 CC5 PVL-negative MSSA (2011-2016)).  
133 Previously sequenced CC5 PVL-positive MRSA from collaborators in Australia (n=14, collected in  
134 2015) and Argentina (n=3; collected in 2003) were also included as comparators.

135

136 Phylogenetic analysis of CC5 strain WGS showed great variability (Figure 1A), with isolates from  
137 various countries dispersed throughout the tree. A strong geographic signal however was apparent  
138 amongst the isolates from Sri Lanka, with all but three CC5-PVL-positive MRSA isolates clustering  
139 into a single clade, herein dubbed the “Sri Lankan clade” (Figure 1B). Isolates from the United  
140 Kingdom (13) and Australia (1) were also found in the Sri Lankan clade, including those from  
141 patients with no known links to Sri Lanka. Within the clade, the isolates were identified as multilocus  
142 sequence type (ST) 5, harboured the enterotoxin gene cluster (*egc*), and for the MRSA isolates  
143 harboured the SCC*mec* IVc staphylococcal cassette chromosome *mec* subtype. All but one isolate  
144 encoded the plasmid-borne enterotoxin genes (*sed*, *sej* and *ser*). Greater variability was apparent for  
145 other traits including the *sep* enterotoxin gene. Genes encoding resistance to erythromycin (*erm*(C))  
146 or tetracycline (*tet*(K)) were variably detected highlighting the dynamic loss/acquisition of mobile

147 genetic elements within the clone. Similarly, a chromosomal mutation associated with quinolone  
148 resistance (*grlA* 80:S-F) was noted sporadically. A single isolate from a UK patient with links to Sri  
149 Lanka was identified as being genotypically multi-drug resistant, encoding *blaZ*, *mecA*, *erm(C)*,  
150 *tet(K)*, *aphA3* and *sat4* genes. Bayesian phylogenetic reconstruction using BEAST (data not shown)  
151 failed to provide significant temporal signal for predicting evolutionary rate and time to common  
152 ancestor.

153

## 154 **Discussion**

155 Particular lineages of MRSA are frequently associated with various geographical origins e.g.  
156 ST8/USA300 (North America); ST93 (Australia); ST80 (North Africa); ST30 (South-West Pacific)  
157 (David and Daum, 2010;Chua et al., 2011). Prior to the current study, CC5 PVL-positive MRSA has  
158 been reported in many countries world-wide (Monecke et al., 2011); however, their origin(s) are  
159 unclear. A recent phylogenomic study of CC5-MRSA isolates from the Western Hemisphere showed  
160 high diversity, even among strains that shared the same *SCCmec* type circulating in the same country  
161 (Challagundla et al., 2018). Very few whole genome sequences from CC5-MRSA isolates from Asian  
162 countries are currently available.

163

164 Herein, in most instances, phylogenetic analysis of CC5 PVL-positive MRSA from four continents  
165 showed clustering according to their geographic location, suggesting they have arisen independently  
166 in different parts of world following the acquisition of PVL phage and/or different *SCCmec* elements.  
167 Our data provide evidence of a successful ST5-PVL-positive MRSA-IVc clone in Sri Lanka with  
168 multiple incursions to distant geographical regions. Thirteen isolates from England were interspersed  
169 within the Sri Lankan clade; ten with known links to Sri Lanka. One isolate from Australia also  
170 clustered within the Sri Lankan clade, however a link to Sri Lanka could not be determined. Whilst in  
171 our study all Sri Lankan isolates were collected systematically without undue bias, it is important to  
172 acknowledge that the number of isolates is small and that they were collected from a single centre

173 over a relatively short timeframe. However, the UK CC5 PVL-positive MRSA isolates in the Sri  
174 Lankan clade, including those with known links to Sri Lanka, were collected over the course of a  
175 decade prior to our study. This suggests that wider circulation of this PVL-positive ST5-MRSA-IVc  
176 clone is likely in Sri Lanka and that our newly collected samples do not simply represent a clonal  
177 outbreak in Anuradhapura Teaching Hospital. A larger study of isolates from other parts of Sri Lanka  
178 and globally is required to help elucidate the origins and dissemination of PVL-positive MRSA  
179 belonging to the CC5 lineage. The ST5-PVL-positive MRSA-IVc clone identified was also  
180 responsible for both CO- and HO-infections, emphasising the increasingly blurred lines between  
181 community and hospital-associated infections reported (Skov and Jensen, 2009).

182

183 In conclusion, we have presented the most detailed genomic analysis of MRSA isolated in Sri Lanka  
184 to date and have demonstrated, at least in the hospital and catchment area studied, that clinical MRSA  
185 infections in Sri Lanka are dominated by a PVL-positive ST5-MRSA-IVc clone. We have also shown  
186 the clone can be found in English patients with a history of travel to Sri Lanka. Further work is  
187 required to determine the prevalence of carriage and infection associated with PVL-positive ST5-  
188 MRSA-IVc in Sri Lanka, and the dynamics of transmission in and out of hospital, and whether these  
189 findings are replicated on a national scale.

190

#### 191 **Conflict of interest**

192 The authors declare that the research was conducted in the absence of any commercial or financial  
193 relationships that could be construed as a potential conflict of interest.

#### 194 **Author Contributions**

195 TdS, AK and BP designed and supervised the study. SJS, EC, MU and SS carried out the field work  
196 and initial microbiological characterisation of the isolates. SC, SD and EB carried out data analysis  
197 and interpretation of the primary dataset. SM carried out genetic characterisation of isolates from LK



198 and UK. BP performed phylogenetic analyses. SM, TdS, AK and BP performed analysis of study  
199 data. AK, BP, TdS and SM wrote the paper. GC, SP, CAA and LD provided data. All authors  
200 contributed to and approved the final manuscript.

## 201 **Funding**

202 TdS is funded by a Wellcome Trust Intermediate Clinical Fellowship (110058/Z/15/Z). LD was  
203 supported by grants COL130871250417 and COL130874455850 from Colciencias. CAA is funded  
204 through an NIH-NIAID grant K24 AI- AI121296. During fieldwork, SJS and EC were supported by  
205 student grants from The Sheffield Medico-Chirurgical Society, The Sheffield Grammer School' Trust  
206 and The 800<sup>th</sup> Lord Mayor's Anniversary Trust.

207

## 208 **Acknowledgements**

209 We thank the Staphylococcal Reference Service team at PHE, Colindale for their assistance with  
210 laboratory work. We also thank the microbiology laboratory staff at the Teaching Hospital  
211 Anuradhapura for help with collection and initial characterisation of isolates. We are grateful to  
212 Carlos M. Luna, Pulmonary Division, Department of Medicine, Jose de San Martin Hospital,  
213 University of Buenos Aires, Buenos Aires, Argentina, for providing bacterial isolates. This work was  
214 presented in part at the 26<sup>th</sup> European Congress of Clinical Microbiology and Infectious Diseases,  
215 Amsterdam, The Netherlands.

216

## 217 **Access to data**

218 The sequence data supporting the results of this article are available in the European Nucleotide  
219 Archive, under project accession number [PRJEB27049](https://www.ebi.ac.uk/ena/record/PRJEB27049).

220

221

## 222 References

- 223 Bell, J.M., Turnidge, J.D., and Sentry, A. (2002). High prevalence of oxacillin-resistant *Staphylococcus*  
224 *aureus* isolates from hospitalized patients in Asia-Pacific and South Africa: results from  
225 SENTRY antimicrobial surveillance program, 1998-1999. *Antimicrob Agents Chemother* 46,  
226 879-881.
- 227 Challagundla, L., Reyes, J., Rafiqullah, I., Sordelli, D.O., Echaniz-Aviles, G., Velazquez-Meza, M.E.,  
228 Castillo-Ramirez, S., Fittipaldi, N., Feldgarden, M., Chapman, S.B., Calderwood, M.S., Carvajal,  
229 L.P., Rincon, S., Hanson, B., Planet, P.J., Arias, C.A., Diaz, L., and Robinson, D.A. (2018).  
230 Phylogenomic Classification and the Evolution of Clonal Complex 5 Methicillin-Resistant  
231 *Staphylococcus aureus* in the Western Hemisphere. *Front Microbiol* 9, 1901.
- 232 Chua, K., Laurent, F., Coombs, G., Grayson, M.L., and Howden, B.P. (2011). Antimicrobial resistance:  
233 Not community-associated methicillin-resistant *Staphylococcus aureus* (CA-MRSA)! A  
234 clinician's guide to community MRSA - its evolving antimicrobial resistance and implications  
235 for therapy. *Clin Infect Dis* 52, 99-114.
- 236 Corea, E., De Silva, T., and Perera, J. (2003). Methicillin-resistant *Staphylococcus aureus*: prevalence,  
237 incidence and risk factors associated with colonization in Sri Lanka. *J Hosp Infect* 55, 145-  
238 148.
- 239 David, M.Z., and Daum, R.S. (2010). Community-associated methicillin-resistant *Staphylococcus*  
240 *aureus*: epidemiology and clinical consequences of an emerging epidemic. *Clin Microbiol Rev*  
241 23, 616-687.
- 242 Frenay, H.M., Bunschoten, A.E., Schouls, L.M., Van Leeuwen, W.J., Vandenbroucke-Grauls, C.M.,  
243 Verhoef, J., and Mooi, F.R. (1996). Molecular typing of methicillin-resistant *Staphylococcus*  
244 *aureus* on the basis of protein A gene polymorphism. *Eur J Clin Microbiol Infect Dis* 15, 60-64.
- 245 Garvey, M.I., Pichon, B., Bradley, C.W., Moiemmen, N.S., Oppenheim, B., and Kearns, A.M. (2016).  
246 Improved understanding of an outbreak of methicillin-resistant *Staphylococcus aureus* in a  
247 regional burns centre via whole-genome sequencing. *J Hosp Infect* 94, 401-404.
- 248 Jayaweera, A.S., Karunarathne, M., Kumbukgolla, W.W., and Thushari, H.L. (2017). Prevalence of  
249 methicillin resistant *Staphylococcus aureus* (MRSA) bacteremia at Teaching Hospital  
250 Anuradhapura, Sri Lanka. *Ceylon Med J* 62, 110-111.
- 251 Jayaweera, J., and Kumbukgolla, W.W. (2017). Antibiotic resistance patterns of methicillin-resistant  
252 *Staphylococcus aureus* (MRSA) isolated from livestock and associated farmers in  
253 Anuradhapura, Sri Lanka. *Germs* 7, 132-139.
- 254 Lahuerta-Marin, A., Guelbenzu-Gonzalo, M., Pichon, B., Allen, A., Doumith, M., Lavery, J.F., Watson,  
255 C., Teale, C.J., and Kearns, A.M. (2016). First report of lukM-positive livestock-associated  
256 methicillin-resistant *Staphylococcus aureus* CC30 from fattening pigs in Northern Ireland. *Vet*  
257 *Microbiol* 182, 131-134.
- 258 Mahalingam, U., Thirunavukarasu, K., and Muruganathan, K. (2014). Methicillin resistant  
259 *Staphylococcus aureus* among nurses in a tertiary care hospital in northern Sri Lanka. *Ceylon*  
260 *Med J* 59, 63-65.
- 261 Maree, C.L., Daum, R.S., Boyle-Vavra, S., Matayoshi, K., and Miller, L.G. (2007). Community-  
262 associated methicillin-resistant *Staphylococcus aureus* isolates causing healthcare-  
263 associated infections. *Emerg Infect Dis* 13, 236-242.
- 264 Monecke, S., Coombs, G., Shore, A.C., Coleman, D.C., Akpaka, P., Borg, M., Chow, H., Ip, M.,  
265 Jatzwauk, L., Jonas, D., Kadlec, K., Kearns, A., Laurent, F., O'brien, F.G., Pearson, J., Ruppelt,  
266 A., Schwarz, S., Scicluna, E., Slickers, P., Tan, H.L., Weber, S., and Ehricht, R. (2011). A field  
267 guide to pandemic, epidemic and sporadic clones of methicillin-resistant *Staphylococcus*  
268 *aureus*. *PLoS One* 6, e17936.
- 269 Pichon, B., Hill, R., Laurent, F., Larsen, A.R., Skov, R.L., Holmes, M., Edwards, G.F., Teale, C., and  
270 Kearns, A.M. (2012). Development of a real-time quadruplex PCR assay for simultaneous

271 detection of nuc, Panton-Valentine leucocidin (PVL), mecA and homologue mecALGA251. *J*  
272 *Antimicrob Chemother* 67, 2338-2341.

273 Shallcross, L.J., Fragaszy, E., Johnson, A.M., and Hayward, A.C. (2013). The role of the Panton-  
274 Valentine leucocidin toxin in staphylococcal disease: a systematic review and meta-analysis.  
275 *Lancet Infect Dis* 13, 43-54.

276 Skov, R.L., and Jensen, K.S. (2009). Community-associated methicillin-resistant *Staphylococcus aureus*  
277 as a cause of hospital-acquired infections. *J Hosp Infect* 73, 364-370.

278 Song, J.H., Hsueh, P.R., Chung, D.R., Ko, K.S., Kang, C.I., Peck, K.R., Yeom, J.S., Kim, S.W., Chang, H.H.,  
279 Kim, Y.S., Jung, S.I., Son, J.S., So, T.M., Lalitha, M.K., Yang, Y., Huang, S.G., Wang, H., Lu, Q.,  
280 Carlos, C.C., Perera, J.A., Chiu, C.H., Liu, J.W., Chongthaleong, A., Thamlikitkul, V., Van, P.H.,  
281 and Group, A.S. (2011). Spread of methicillin-resistant *Staphylococcus aureus* between the  
282 community and the hospitals in Asian countries: an ANSORP study. *J Antimicrob Chemother*  
283 66, 1061-1069.

284

|       | Genotypic characteristics |                      |                                                |        |            |                                |                              |                      | Demographic and Clinical Characteristics |      |       |     |    |                        |     |     |    |    |                                   |
|-------|---------------------------|----------------------|------------------------------------------------|--------|------------|--------------------------------|------------------------------|----------------------|------------------------------------------|------|-------|-----|----|------------------------|-----|-----|----|----|-----------------------------------|
|       | <i>spa</i> types (No.)    | No. subjected to WGS | Resistome                                      | Toxome |            |                                | SCC <i>mec</i> <sup>b</sup>  | MLST ST <sup>b</sup> | Age Distribution (Years) <sup>a</sup>    |      |       |     |    | Clinical Presentations |     |     |    |    | Hospital or Community onset (No.) |
|       |                           |                      |                                                | PVL    | <i>egc</i> | Other enterotoxins             |                              |                      | <1                                       | 1-15 | 16-60 | >60 | NK | SSTI*                  | BAC | EMP | OM | NK |                                   |
| CC1   | t657 (n=3)                | ND                   | ND                                             | +      | ND         | ND                             | ND                           | ND                   | 1                                        | 2    |       |     |    | 2                      | 1   |     |    |    | CO (2), NK (1)                    |
|       | t127 (n=5)                | ND                   | ND                                             | +      | (n=1)      | ND                             | ND                           | ND                   |                                          | 2    | 2     | 1   |    | 5                      |     |     |    |    | CO (2), HO (3)                    |
| CC5   | t002 (n=51)               | 34                   | <i>blaZ, mecA, grlA 80:S-F, erm(C), tet(K)</i> | +      | (n=50)     | <i>sed, sej, ser, sep</i>      | IV(2B)-c (n=33) <sup>c</sup> | 5                    | 8                                        | 15   | 22    | 5   | 1  | 42                     | 5   | 2   | 1  | 1  | CO (25), HO (9), NK (17)          |
|       | t010 (n=4)                | 4                    | <i>blaZ, mecA, erm(C)</i>                      | +      | (n=3)      | <i>sed, sej, ser, sep</i>      | IV(2B)-c                     | 5                    |                                          |      | 3     | 1   |    | 3                      |     |     | 1  |    | CO (4)                            |
|       | t045 (n=1)                | 1                    | <i>blaZ, mecA, tet(K)</i>                      | +      |            | <i>sed, sej, ser, sep</i>      | IV(2B)-c                     | 5                    |                                          |      | 1     |     |    | 1                      |     |     |    |    | CO (1)                            |
|       | t1062 (n=1)               | 1                    | <i>blaZ, mecA</i>                              | +      |            | <i>sea, sed, sej, ser, sep</i> | IV(2B)-c                     | 5                    |                                          |      |       |     | 1  | 1                      |     |     |    |    | CO (1)                            |
|       | t5490 (n=1)               | 1                    | <i>blaZ, mecA</i>                              | +      |            | <i>sed, sej, ser, sep</i>      | IV(2B)-c                     | 5                    |                                          |      | 1     |     |    | 1                      |     |     |    |    | HO (1)                            |
|       | t7342 (n=1)               | ND                   | ND                                             | -      | ND         | ND                             | ND                           | ND                   |                                          |      |       | 1   |    |                        |     |     | 1  |    |                                   |
| CC6   | t304 (n=1)                | ND                   | ND                                             | -      | ND         | ND                             | ND                           | ND                   |                                          |      |       | 1   |    |                        | 1   |     |    |    | CO (1)                            |
| CC8   | t008 (n=1)                | ND                   | ND                                             | -      | ND         | ND                             | ND                           | ND                   |                                          |      |       | 1   |    | 1                      |     |     |    |    | CO (1)                            |
| CC30  | t021 (n=2)                | ND                   | ND                                             | +      | ND         | ND                             | ND                           | ND                   |                                          |      | 1     | 1   |    | 1                      | 1   |     |    |    | NK (1), CO (1)                    |
|       | t425 (n=13)               | ND                   | ND                                             | -      | ND         | ND                             | ND                           | ND                   |                                          | 2    | 10    | 1   |    | 6                      | 6   |     |    | 1  | CO (5), HO (8)                    |
|       | t15007 (n=1)              | ND                   | ND                                             | -      | ND         | ND                             | ND                           | ND                   |                                          |      | 1     |     |    | 1                      |     |     |    |    | HO (1)                            |
|       | t4410 (n=2)               | ND                   | ND                                             | -      | ND         | ND                             | ND                           | ND                   |                                          | 1    | 1     |     |    | 2                      |     |     |    |    | HO (1), CO (1)                    |
| CC45  | t465 (n=1)                | ND                   | ND                                             | -      | ND         | ND                             | ND                           | ND                   |                                          | 1    |       |     |    | 1                      |     |     |    |    | HO (1)                            |
| CC59  | t437 (n=1)                | ND                   | ND                                             | -      | ND         | ND                             | ND                           | ND                   |                                          |      | 1     |     |    | 1                      |     |     |    |    | HO (1)                            |
|       | t7028 (n=3)               | ND                   | ND                                             | -      | ND         | ND                             | ND                           | ND                   |                                          |      | 2     |     | 1  | 1                      | 1   |     |    | 1  | HO (2), NK (1)                    |
| CC97  | t15010 (n=1)              | ND                   | ND                                             | -      | ND         | ND                             | ND                           | ND                   |                                          |      | 1     |     |    | 1                      |     |     |    |    | HO (1)                            |
| CC101 | t1212 (n=1)               | ND                   | ND                                             | -      | ND         | ND                             | ND                           | ND                   |                                          |      | 1     |     |    | 1                      |     |     |    |    | NK (1)                            |

286 **Table 1. Genotypic, demographic and clinical characteristics of MRSA isolates from Sri Lanka**

287

288 All isolates were *mecA* positive by PCR. *egc* = enterotoxin gene cluster (*seg/i/m/n/o/u*); SSTI = skin and soft tissue infection; \* hospital onset cases of SSTI were surgical  
 289 wound infections; BAC = bacteraemia; EMP = empyema; OM = osteomyelitis; CO = onset; HO = hospital onset; ND = Not done; NK = Not known.

290 <sup>a</sup> Sex distribution of cases: 48 male, 40 female, 6 unknown

291 <sup>b</sup> Derived *in silico* from WGS data

292 <sup>c</sup> n = 1 was SCC*mecIV*(2B)-a

293

294 Figure caption

295 **Figure 1. Alignment of international MLST CC5 *Staphylococcus aureus* genomes**

296 **A).** Phylogenetic tree indicating relationships between international CC5 *S. aureus* including their PVL (★) and *mecA* (■) status based on SNP analysis of  
 297 whole genome sequences. Phylogeny was inferred by maximum likelihood analysis using RAxML GTRCAT model with 100 bootstraps from aligned  
 298 polymorphic sites allowing 20% of Ns and gaps. Polymorphic sites were called using gatk2 and filtered (AD ratio =0.9; min depth =10; MQ score > 30;  
 299 QUAL score >40) using genome NC\_002745 as mapping reference. The tree was drawn using FigTree v1.4.3. Country of origin denoted as follows; blue:  
 300 England; red: Sri Lanka; green: Australia; yellow: Argentina. Scale is in substitutions per site and indicates ≈ 130 SNPs. **B)** ★ Indicates UK patients with  
 301 known links to Sri Lanka. □ MSSA; SCC*mec* types: ■ IV-a; ■ : IV-c ; ■ VI; ■ NT. In gene profile section, ■ indicates presence of gene. Scale is in  
 302 substitutions per site and represents ≈ 13 SNPs.

303
